# Supplementary material for: Sensitivity and specificity of the Patient Health Questionnaire (PHQ-9, PHQ-8, PHQ-2) and General Anxiety Disorder scale (GAD-7, GAD-2) for depression and anxiety diagnosis: a cross-sectional study in a Peruvian hospital population
Source: PubMed Central journal article supplement — BMJ Open. 2023 Sep 15;13(9):e076193. doi: 10.1136/bmjopen-2023-076193 (PMC10510859; doi:10.1136/bmjopen-2023-076193), 2023-09-15
Supplement: bmjopen-2023-076193supp001.pdf [file bmjopen-2023-076193supp001.pdf]

**Supplementary material 1.** Sex and age of the participants in our study and of the total number of people hospitalised in 2022.

|                  | Our study |        | Total inpatients in 2022 |       | p     |
|------------------|-----------|--------|--------------------------|-------|-------|
|                  | n         | %      |                          |       |       |
| Sex              |           |        |                          |       |       |
| Men              | 547       | 40.60% | 9677                     | 43.2% | 0.971 |
| Women            | 800       | 59.40% | 12732                    | 56.8% |       |
| Age (categories) |           |        |                          |       |       |
| 18-29            | 107       | 7.90%  | 1962                     | 8.8%  | 1.000 |
| 30-39            | 164       | 12.20% | 3486                     | 15.6% |       |
| 40-49            | 214       | 15.90% | 3145                     | 14.0% |       |
| 50-59            | 284       | 21.10% | 3497                     | 15.6% |       |
| 60-69            | 294       | 21.80% | 4276                     | 19.1% |       |
| 70-79            | 203       | 15.10% | 3806                     | 17.0% |       |
| 80 to more       | 81        | 6.00%  | 2227                     | 9.9%  |       |

Note: p = chi-square test.
