# Supplementary material for: Sensitivity and specificity of the Patient Health Questionnaire (PHQ-9, PHQ-8, PHQ-2) and General Anxiety Disorder scale (GAD-7, GAD-2) for depression and anxiety diagnosis: a cross-sectional study in a Peruvian hospital population
Source: PubMed Central journal article supplement — BMJ Open. 2023 Sep 15;13(9):e076193. doi: 10.1136/bmjopen-2023-076193 (PMC10510859; doi:10.1136/bmjopen-2023-076193), 2023-09-15
Supplement: bmjopen-2023-076193supp003.pdf [file bmjopen-2023-076193supp003.pdf]

**Supplementary material 3. Do-file of STATA used in our study.**

```
use "E:\Database_v1.dta", clear

*Table 1 - Socio-demographic analysis

global catvars_table1 sex agecat civilstatus educationcat work Livingalone
Historypsychiatricdx depression anxiety

tabout $catvars_table1 depression using Table1.xlsx, ///
  replace c(freq col) clab(No. %) f(0c 1p) style(xlsx) font(bold) ///
  ptotal(none) stats(chi2) stpos(col) ppos(only) plab(P value) ///
  title(Table 1. Sociodemographic characteristics) ///
  fn(Note: n=number, %=Percentage.) twidth(14) sheet(Table1)

* Table 2. Sensitivity, specificity, +LR, -LR, PPV, NPV, and Youden's index for different PHQ and GAD cut-off points compared to the gold standard.
tab cutoffPHQ9_7
diagt depression cutoffPHQ9_7
tab cutoffPHQ9_10
tab PHQ9algorithm
diagt depression PHQ9algorithm
tab PHQ9ajus_algorithm
diagt depression PHQ9ajus_algorithm
diagt depression cutoffPHQ9_10
tab cutoffPHQ8_7
diagt depression cutoffPHQ8_7
tab cutoffPHQ2_2
diagt depression cutoffPHQ2_2
tab cutoffGAD7_8
diagt anxiety cutoffGAD7_8
tab cutoffGAD7_10
diagt anxiety cutoffGAD7_10
tab cutoffGAD2_2
diagt anxiety cutoffGAD2_2

* Supplementary material 3. Sensitivity, specificity, +LR, -LR, PPV, NPV, and Youden's index for different PHQ cut-off points compared to the gold standard.
* PHQ-9 - Sensitivity, specificity, +LR, -LR, PPV, NPV, and Youden's index

tab cutoffPHQ9_1
diagt depression cutoffPHQ9_1
tab cutoffPHQ9_2
diagt depression cutoffPHQ9_2
tab cutoffPHQ9_3
diagt depression cutoffPHQ9_3
tab cutoffPHQ9_4
diagt depression cutoffPHQ9_4
tab cutoffPHQ9_5
diagt depression cutoffPHQ9_5
tab cutoffPHQ9_6
diagt depression cutoffPHQ9_6
tab cutoffPHQ9_7
diagt depression cutoffPHQ9_7
tab cutoffPHQ9_8
diagt depression cutoffPHQ9_8
tab cutoffPHQ9_9
diagt depression cutoffPHQ9_9
tab cutoffPHQ9_10
diagt depression cutoffPHQ9_10
tab cutoffPHQ9_11
diagt depression cutoffPHQ9_11
tab cutoffPHQ9_12
diagt depression cutoffPHQ9_12
```

tab cutoffPHQ9\_13  
diagt depression cutoffPHQ9\_13  
tab cutoffPHQ9\_14  
diagt depression cutoffPHQ9\_14  
tab cutoffPHQ9\_15  
diagt depression cutoffPHQ9\_15  
tab cutoffPHQ9\_16  
diagt depression cutoffPHQ9\_16  
tab cutoffPHQ9\_17  
diagt depression cutoffPHQ9\_17  
tab cutoffPHQ9\_18  
diagt depression cutoffPHQ9\_18  
tab cutoffPHQ9\_19  
diagt depression cutoffPHQ9\_19  
tab cutoffPHQ9\_20  
diagt depression cutoffPHQ9\_20  
tab cutoffPHQ9\_21  
diagt depression cutoffPHQ9\_21  
tab cutoffPHQ9\_22  
diagt depression cutoffPHQ9\_22  
tab cutoffPHQ9\_23  
diagt depression cutoffPHQ9\_23  
tab cutoffPHQ9\_24  
diagt depression cutoffPHQ9\_24  
tab cutoffPHQ9\_25  
diagt depression cutoffPHQ9\_25  
tab cutoffPHQ9\_26  
diagt depression cutoffPHQ9\_26  
tab cutoffPHQ9\_27  
diagt depression cutoffPHQ9\_27

**\*PHQ-8 - Sensitivity, specificity, +LR, -LR, PPV, NPV, and Youden's index**

tab cutoffPHQ8\_1  
diagt depression cutoffPHQ8\_1  
tab cutoffPHQ8\_2  
diagt depression cutoffPHQ8\_2  
tab cutoffPHQ8\_3  
diagt depression cutoffPHQ8\_3  
tab cutoffPHQ8\_4  
diagt depression cutoffPHQ8\_4  
tab cutoffPHQ8\_5  
diagt depression cutoffPHQ8\_5  
tab cutoffPHQ8\_6  
diagt depression cutoffPHQ8\_6  
tab cutoffPHQ8\_7  
diagt depression cutoffPHQ8\_7  
tab cutoffPHQ8\_8  
diagt depression cutoffPHQ8\_8  
tab cutoffPHQ8\_9  
diagt depression cutoffPHQ8\_9  
tab cutoffPHQ8\_10  
diagt depression cutoffPHQ8\_10  
tab cutoffPHQ8\_11  
diagt depression cutoffPHQ8\_11  
tab cutoffPHQ8\_12  
diagt depression cutoffPHQ8\_12  
tab cutoffPHQ8\_13  
diagt depression cutoffPHQ8\_13  
tab cutoffPHQ8\_14  
diagt depression cutoffPHQ8\_14  
tab cutoffPHQ8\_15  
diagt depression cutoffPHQ8\_15  
tab cutoffPHQ8\_16  
diagt depression cutoffPHQ8\_16  
tab cutoffPHQ8\_17  
diagt depression cutoffPHQ8\_17

```
tab cutoffPHQ8_18
diagt depression cutoffPHQ8_18
tab cutoffPHQ8_19
diagt depression cutoffPHQ8_19
tab cutoffPHQ8_20
diagt depression cutoffPHQ8_20
tab cutoffPHQ8_21
diagt depression cutoffPHQ8_21
tab cutoffPHQ8_22
diagt depression cutoffPHQ8_22
tab cutoffPHQ8_23
diagt depression cutoffPHQ8_23
tab cutoffPHQ8_24
diagt depression cutoffPHQ8_24
```

**\* PHQ-9 algorithm - Sensitivity, specificity, +LR, -LR, PPV, NPV, and Youden's index**

```
tab PHQ9algorithm
diagt depression PHQ9algorithm
```

**\* PHQ-9 adjusted algorithm - Sensitivity, specificity, +LR, -LR, PPV, NPV, and Youden's index**

```
tab PHQ9ajus_algorithm
diagt depression PHQ9ajus_algorithm
```

**\* PHQ-2 - Sensitivity, specificity, +LR, -LR, PPV, NPV, and Youden's index**

```
tab cutoffPHQ2_1
diagt depression cutoffPHQ2_1
tab cutoffPHQ2_2
diagt depression cutoffPHQ2_2
tab cutoffPHQ2_3
diagt depression cutoffPHQ2_3
tab cutoffPHQ2_4
diagt depression cutoffPHQ2_4
tab cutoffPHQ2_5
diagt depression cutoffPHQ2_5
tab cutoffPHQ2_6
diagt depression cutoffPHQ2_6
```

**\*Supplementary material 4. Sensitivity, specificity, +LR, -LR, PPV, NPV, and Youden's index for different GAD cut-off points compared to the gold standard.**

**\*GAD-7 - Sensitivity, specificity, +LR, -LR, PPV, NPV, and Youden's index**

```
tab cutoffGAD7_1
diagt anxiety cutoffGAD7_1
tab cutoffGAD7_2
diagt anxiety cutoffGAD7_2
tab cutoffGAD7_3
diagt anxiety cutoffGAD7_3
tab cutoffGAD7_4
diagt anxiety cutoffGAD7_4
tab cutoffGAD7_5
diagt anxiety cutoffGAD7_5
tab cutoffGAD7_6
diagt anxiety cutoffGAD7_6
tab cutoffGAD7_7
diagt anxiety cutoffGAD7_7
tab cutoffGAD7_8
diagt anxiety cutoffGAD7_8
tab cutoffGAD7_9
diagt anxiety cutoffGAD7_9
tab cutoffGAD7_10
diagt anxiety cutoffGAD7_10
tab cutoffGAD7_11
diagt anxiety cutoffGAD7_11
```

```
tab cutoffGAD7_12
diagt anxiety cutoffGAD7_12
tab cutoffGAD7_13
diagt anxiety cutoffGAD7_13
tab cutoffGAD7_14
diagt anxiety cutoffGAD7_14
tab cutoffGAD7_15
diagt anxiety cutoffGAD7_15
tab cutoffGAD7_16
diagt anxiety cutoffGAD7_16
tab cutoffGAD7_17
diagt anxiety cutoffGAD7_17
tab cutoffGAD7_18
diagt anxiety cutoffGAD7_18
tab cutoffGAD7_19
diagt anxiety cutoffGAD7_19
tab cutoffGAD7_20
diagt anxiety cutoffGAD7_20
tab cutoffGAD7_21
diagt anxiety cutoffGAD7_21
```

**\* GAD-2 - Sensitivity, specificity, +LR, -LR, PPV, NPV, and Youden's index**

```
tab cutoffGAD2_0
diagt anxiety cutoffGAD2_0
tab cutoffGAD2_1
diagt anxiety cutoffGAD2_1
tab cutoffGAD2_2
diagt anxiety cutoffGAD2_2
tab cutoffGAD2_3
diagt anxiety cutoffGAD2_3
tab cutoffGAD2_4
diagt anxiety cutoffGAD2_4
tab cutoffGAD2_5
diagt anxiety cutoffGAD2_5
tab cutoffGAD2_6
diagt anxiety cutoffGAD2_6
```

**\*Figures 2 - ROC curve**

```
roccomp depression PHQ9TOTAL PHQ8TOTAL PHQ9algorithm PHQ9ajus_algorithm PHQ2TOTAL, graph
summary plotlopts(mcolor(red) lcolor(red)) plot2opts(mcolor(blue) lcolor(blue))
plot3opts(mcolor(orange) lcolor(orange)) plot4opts(mcolor(green) lcolor(green))
plot5opts(mcolor(purple) lcolor(purple)) legend(order(1 "PHQ-9 (AUC=0.805 [0.779-
0.831])" 2 "PHQ-8 (AUC=0.802 [0.776-0.828])" 3 "PHQ-9 algorithm (AUC=0.641 [0.614-
0.667])" 4 "PHQ-9 adjusted algorithm (AUC=0.723 [0.696-0.749])" 5 "PHQ-2 (AUC=0.771
[0.743-0.799])" 6 "Reference") size(2.5) position(7) cols(2) rows(3))
```

```
graph export "E:\Figure2.tif", as(tif) replace
```

**\*Figures 3 - ROC curve**

```
roccomp anxiety GAD7TOTAL GAD2TOTAL, graph summary plotlopts(mcolor(red) lcolor(red))
plot2opts(mcolor(blue) lcolor(blue)) legend(order(1 "GAD-7 (AUC=0.718 [0.622-0.814])" 2
"GAD-2 (AUC=0.685 [0.587-0.783])" 3 "Reference") size(2.5) position(7) cols(2) rows(3))
```

```
graph export "E:\Figure3.tif", as(tif) replace
```
