# Supplementary material for: Sensitivity and specificity of the Patient Health Questionnaire (PHQ-9, PHQ-8, PHQ-2) and General Anxiety Disorder scale (GAD-7, GAD-2) for depression and anxiety diagnosis: a cross-sectional study in a Peruvian hospital population
Source: PubMed Central journal article supplement — BMJ Open. 2023 Sep 15;13(9):e076193. doi: 10.1136/bmjopen-2023-076193 (PMC10510859; doi:10.1136/bmjopen-2023-076193), 2023-09-15
Supplement: bmjopen-2023-076193supp005.pdf [file bmjopen-2023-076193supp005.pdf]

**Supplementary material 5.** Sensitivity, specificity, +LR, –LR, PPV, NPV, and Youden’s index for different PHQ cut-off points compared to the gold standard.

| Method | Cut-off Points | n (%)             | Sensitivity (95%CI)       | Specificity (95%CI)       | +LR (95%CI)               | -LR (95%CI)               | PPV (95%CI)               | NPV (95%CI)               | Youden Index |
|--------|----------------|-------------------|---------------------------|---------------------------|---------------------------|---------------------------|---------------------------|---------------------------|--------------|
| PHQ-9  | ≥1             | 1246 (92.5)       | 99.7 (98.3 - 100.0)       | 9.9 (8.1 - 11.9)          | 1.11 (1.08 - 1.13)        | 0.03 (0.00 - 0.22)        | 26.7 (24.3 - 29.3)        | 99.0 (94.6 - 100.0)       | 9.6          |
|        | ≥2             | 1145 (85.0)       | 98.2 (96.1 - 99.3)        | 19.3 (17.0 - 21.9)        | 1.22 (1.18 - 1.26)        | 0.93 (0.04 - 0.21)        | 28.6 (26.0 - 31.4)        | 97.0 (93.6 - 98.9)        | 17.5         |
|        | ≥3             | 1004 (74.5)       | 95.5 (92.7 - 97.5)        | 32.4 (29.5 - 35.4)        | 1.41 (1.35 - 1.48)        | 0.14 (0.84 - 0.23)        | 31.8 (28.9 - 34.8)        | 95.6 (92.9 - 97.5)        | 27.9         |
|        | ≥4             | 850 (63.1)        | 91.3 (87.8 - 94.1)        | 46.2 (43.1 - 49.3)        | 1.70 (1.59 - 1.81)        | 0.19 (0.13 - 0.27)        | 35.9 (32.7 - 39.2)        | 94.2 (91.7 - 96.1)        | 37.5         |
|        | ≥5             | 720 (53.5)        | 87.4 (83.4 - 90.8)        | 57.7 (54.6 - 60.8)        | 2.07 (1.90 - 2.25)        | 0.22 (0.16 - 0.29)        | 40.6 (36.9 - 44.2)        | 93.3 (91.1 - 95.1)        | 45.1         |
|        | ≥6             | 627 (46.6)        | 80.5 (75.9 - 84.6)        | 64.7 (61.6 - 67.6)        | 2.28 (2.07 - 2.52)        | 0.30 (0.24 - 0.38)        | 42.9 (39.0 - 46.9)        | 91.0 (88.6 - 93.0)        | 45.2         |
|        | ≥7             | <b>537 (39.9)</b> | <b>76.0 (71.1 - 80.5)</b> | <b>72.1 (69.2 - 74.8)</b> | <b>2.72 (2.42 - 3.06)</b> | <b>0.33 (0.27 - 0.40)</b> | <b>47.3 (43.0 - 51.6)</b> | <b>90.1 (87.9 - 92.1)</b> | <b>48.1</b>  |
|        | ≥8             | 454 (33.7)        | 68.9 (63.6 - 73.8)        | 77.9 (75.2 - 80.4)        | 3.11 (2.72 - 3.57)        | 0.40 (0.34 - 0.47)        | 50.7 (46.0 - 55.4)        | 88.4 (86.1 - 90.4)        | 46.8         |
|        | ≥9             | 371 (27.5)        | 60.2 (54.7 - 65.5)        | 83.2 (80.8 - 85.5)        | 3.59 (3.05 - 4.22)        | 0.48 (0.42 - 0.55)        | 54.2 (49.0 - 59.3)        | 86.4 (84.1 - 88.5)        | 43.4         |
|        | ≥10            | 309 (22.9)        | 54.2 (48.7 - 59.6)        | 87.4 (85.2 - 89.3)        | 4.29 (3.55 - 5.18)        | 0.52 (0.47 - 0.59)        | 58.6 (53.9 - 63.1)        | 85.3 (83.7 - 86.7)        | 41.6         |
|        | ≥11            | 252 (18.7)        | 44.9 (39.5 - 50.4)        | 89.9 (87.9 - 91.7)        | 4.46 (3.58 - 5.55)        | 0.61 (0.56 - 0.68)        | 59.5 (53.2 - 65.6)        | 83.2 (80.8 - 85.4)        | 34.8         |
|        | ≥12            | 212 (15.7)        | 38.9 (33.7 - 44.4)        | 91.9 (90.1 - 93.5)        | 4.81 (3.76 - 6.16)        | 0.67 (0.61 - 0.73)        | 61.3 (54.4 - 67.9)        | 82.0 (79.7 - 84.2)        | 30.8         |
|        | ≥13            | 161 (12.0)        | 31.4 (26.5 - 36.7)        | 94.5 (92.9 - 95.8)        | 5.69 (4.21 - 7.67)        | 0.73 (0.67 - 0.78)        | 65.2 (57.3 - 72.5)        | 80.7 (78.3 - 82.9)        | 25.9         |
|        | ≥14            | 138 (10.2)        | 26.3 (21.7 - 31.4)        | 95.1 (93.5 - 96.3)        | 5.34 (3.86 - 7.38)        | 0.78 (0.73 - 0.83)        | 63.8 (55.2 - 71.8)        | 79.7 (77.3 - 81.9)        | 21.4         |
|        | ≥15            | 102 (7.6)         | 19.8 (15.6 - 24.4)        | 96.4 (95.1 - 97.5)        | 5.56 (3.78 - 8.19)        | 0.83 (0.79 - 0.88)        | 64.7 (54.6 - 73.9)        | 78.5 (76.1 - 80.7)        | 16.2         |
|        | ≥16            | 79 (5.9)          | 15.3 (11.6 - 19.6)        | 97.2 (96.0 - 98.2)        | 5.52 (3.54 - 8.61)        | 0.87 (0.83 - 0.91)        | 64.6 (53.0 - 75.0)        | 77.7 (75.3 - 79.9)        | 12.5         |
|        | ≥17            | 57 (4.2)          | 10.5 (7.4 - 14.3)         | 97.8 (96.7 - 98.6)        | 4.83 (2.87 - 8.11)        | 0.92 (0.88 - 0.95)        | 61.4 (47.6 - 74.0)        | 76.8 (74.4 - 79.1)        | 8.3          |
|        | ≥18            | 48 (3.6)          | 8.4 (5.6 - 11.9)          | 98.0 (97.0 - 98.8)        | 4.25 (2.42 - 7.44)        | 0.94 (0.90 - 0.97)        | 58.3 (43.2 - 72.4)        | 76.4 (74.0 - 78.7)        | 6.4          |
|        | ≥19            | 40 (3.0)          | 6.9 (4.4 - 10.2)          | 98.3 (97.3 - 99.0)        | 4.10 (2.22 - 7.59)        | 0.95 (0.92 - 0.98)        | 57.5 (40.9 - 73.0)        | 76.2 (73.8 - 78.5)        | 5.2          |
|        | ≥20            | 35 (2.4)          | 4.5 (2.5 - 7.3)           | 98.3 (97.3 - 99.0)        | 2.68 (1.35 - 5.30)        | 0.97 (0.95 - 1.00)        | 46.9 (29.1 - 65.3)        | 75.7 (73.3 - 78.0)        | 2.8          |
| ≥21    | 26 (1.9)       | 3.9 (2.1 - 6.6)   | 98.7 (97.8 - 99.3)        | 3.03 (1.42 - 6.48)        | 0.97 (0.95 - 1.00)        | 50.0 (29.9 - 70.1)        | 75.7 (73.3 - 78.0)        | 2.6                       |              |
| ≥22    | 20 (1.5)       | 2.7 (1.2 - 5.1)   | 98.9 (98.1 - 99.5)        | 2.48 (1.04 - 5.94)        | 0.98 (0.97 - 1.00)        | 45.0 (23.1 - 68.5)        | 75.5 (73.1 - 77.8)        | 1.6                       |              |
| ≥23    | 16 (1.2)       | 1.5 (0.5 - 3.5)   | 98.9 (98.1 - 99.5)        | 1.38 (0.48 - 3.94)        | 1.00 (0.98 - 1.01)        | 31.3 (11.0 - 58.7)        | 75.3 (72.9 - 77.6)        | 0.4                       |              |
| ≥24    | 10 (0.7)       | 0.9 (0.2 - 2.6)   | 99.3 (98.6 - 99.7)        | 1.30 (0.34 - 5.00)        | 1.00 (0.99 - 1.01)        | 30.0 (6.7 - 65.2)         | 75.2 (72.8 - 77.5)        | 0.2                       |              |
| ≥25    | 4 (0.3)        | 0.3 (0.0 - 1.7)   | 99.7 (99.1 - 99.9)        | 1.01 (0.11 - 9.69)        | 1.00 (0.99 - 1.01)        | 25.0 (0.6 - 80.6)         | 75.2 (72.8 - 77.5)        | 0.0                       |              |
| ≥26    | 2 (0.2)        | 0.0 (0.0 - 1.1)   | 99.8 (99.3 - 100.0)       | 0.00 (0.00 - 0.00)        | 1.00 (1.00 - 1.00)        | 0.0 (0.0 - 84.2)          | 75.2 (72.8 - 77.5)        | -0.2                      |              |
| ≥27    | 2 (0.2)        | 0.0 (0.0 - 1.1)   | 99.8 (99.3 - 100.0)       | 0.00 (0.00 - 0.00)        | 1.00 (1.00 - 1.00)        | 0.0 (0.0 - 84.2)          | 75.2 (72.8 - 77.5)        | -0.2                      |              |
| PHQ-8  | ≥1             | 1244 (92.4)       | 99.4 (97.9 - 99.9)        | 10.0 (8.2 - 12.0)         | 1.10 (1.08 - 1.13)        | 0.06 (0.01 - 0.24)        | 26.7 (24.2 - 29.2)        | 98.1 (93.2 - 99.8)        | 9.4          |
|        | ≥2             | 1141 (84.7)       | 98.2 (96.1 - 99.3)        | 19.7 (17.3 - 22.3)        | 1.22 (1.18 - 1.27)        | 0.09 (0.04 - 0.20)        | 28.7 (26.1 - 31.5)        | 97.1 (93.8 - 98.9)        | 17.9         |
|        | ≥3             | 998 (74.1)        | 95.5 (92.7 - 97.5)        | 33.0 (30.1 - 36.0)        | 1.42 (1.36 - 1.50)        | 0.14 (0.08 - 0.23)        | 32.0 (29.1 - 35.0)        | 95.7 (93.0 - 97.6)        | 28.5         |
|        | ≥4             | 846 (62.8)        | 91.3 (87.8 - 94.1)        | 46.6 (43.5 - 49.7)        | 1.71 (1.60 - 1.83)        | 0.19 (0.13 - 0.27)        | 36.1 (32.8 - 39.4)        | 94.2 (91.8 - 96.1)        | 37.9         |
|        | ≥5             | 701 (52.0)        | 85.6 (81.4 - 89.2)        | 59.0 (55.9 - 62.1)        | 2.09 (1.92 - 2.28)        | 0.24 (0.19 - 0.32)        | 40.8 (37.1 - 44.5)        | 92.6 (90.3 - 94.5)        | 44.7         |
|        | ≥6             | 611 (45.4)        | 79.9 (75.2 - 84.1)        | 66.0 (63.0 - 69.0)        | 2.35 (2.13 - 2.61)        | 0.30 (0.24 - 0.38)        | 43.7 (39.7 - 47.7)        | 90.9 (88.6 - 92.9)        | 46.0         |
|        | ≥7             | <b>521 (38.7)</b> | <b>74.3 (69.2 - 78.9)</b> | <b>73.1 (70.2 - 75.8)</b> | <b>2.76 (2.44 - 3.10)</b> | <b>0.35 (0.29 - 0.42)</b> | <b>47.6 (43.2 - 52.0)</b> | <b>89.6 (87.3 - 91.6)</b> | <b>47.4</b>  |

|                          |            |                    |                           |                           |                           |                           |                           |                           |             |
|--------------------------|------------|--------------------|---------------------------|---------------------------|---------------------------|---------------------------|---------------------------|---------------------------|-------------|
| ≥8                       | 428 (31.8) | 65.6 (60.2 - 70.7) | 79.4 (76.7 - 81.8)        | 3.18 (2.75 - 3.67)        | 0.43 (0.37 - 0.50)        | 51.2 (46.3 - 56.0)        | 87.5 (85.2 - 89.6)        | 44.9                      |             |
| ≥9                       | 357 (26.5) | 58.4 (52.9 - 63.7) | 84.0 (81.6 - 86.2)        | 3.65 (3.09 - 4.32)        | 0.50 (0.44 - 0.56)        | 54.6 (49.3 - 59.9)        | 86.0 (83.6 - 88.1)        | 42.4                      |             |
| ≥10                      | 286 (21.2) | 50.0 (44.5 - 55.5) | 88.3 (86.1 - 90.2)        | 4.26 (3.48 - 5.20)        | 0.57 (0.51 - 0.63)        | 58.4 (52.4 - 64.2)        | 84.3 (81.9 - 86.4)        | 38.3                      |             |
| ≥11                      | 233 (17.3) | 42.2 (36.9 - 47.7) | 90.9 (89.0 - 92.6)        | 4.65 (3.69 - 5.86)        | 0.64 (0.58 - 0.70)        | 60.5 (53.9 - 66.8)        | 82.7 (80.3 - 84.9)        | 33.1                      |             |
| ≥12                      | 189 (14.0) | 34.7 (29.6 - 40.1) | 92.8 (91.0 - 94.3)        | 4.82 (3.70 - 6.28)        | 0.70 (0.65 - 0.76)        | 61.4 (54.0 - 68.4)        | 81.2 (78.8 - 83.4)        | 27.5                      |             |
| ≥13                      | 138 (10.2) | 27.2 (22.5 - 32.4) | 95.4 (93.9 - 96.6)        | 5.87 (4.22 - 8.17)        | 0.76 (0.71 - 0.82)        | 65.9 (57.4 - 73.8)        | 79.9 (77.5 - 82.1)        | 22.6                      |             |
| ≥14                      | 103 (8.1)  | 21.9 (17.5 - 26.7) | 96.4 (95.1 - 97.5)        | 6.15 (4.21 - 8.99)        | 0.81 (0.76 - 0.86)        | 67.0 (57.3 - 75.7)        | 78.9 (76.5 - 81.2)        | 18.3                      |             |
| ≥15                      | 80 (5.9)   | 15.6 (11.9 - 19.9) | 97.2 (96.0 - 98.2)        | 5.63 (3.62 - 8.77)        | 0.87 (0.83 - 0.91)        | 65.0 (53.5 - 75.3)        | 77.7 (75.3 - 80.0)        | 12.8                      |             |
| ≥16                      | 58 (4.3)   | 10.5 (7.4 - 14.3)  | 97.7 (96.6 - 98.6)        | 4.62 (2.77 - 7.70)        | 0.92 (0.88 - 0.95)        | 60.3 (46.6 - 73.0)        | 76.8 (74.4 - 79.1)        | 8.2                       |             |
| ≥17                      | 46 (3.4)   | 7.2 (4.7 - 10.5)   | 97.8 (96.7 - 98.6)        | 3.31 (1.88 - 5.82)        | 0.95 (0.92 - 0.98)        | 52.2 (36.9 - 67.1)        | 76.2 (73.8 - 78.5)        | 5.0                       |             |
| ≥18                      | 36 (2.7)   | 5.7 (3.5 - 8.7)    | 98.3 (97.3 - 99.0)        | 3.39 (1.78 - 6.44)        | 0.96 (0.93 - 0.99)        | 52.8 (35.5 - 69.6)        | 76.0 (73.6 - 78.3)        | 4.0                       |             |
| ≥19                      | 30 (2.2)   | 4.8 (2.8 - 7.7)    | 98.6 (97.7 - 99.2)        | 3.47 (1.71 - 7.03)        | 0.97 (0.94 - 0.99)        | 53.3 (34.3 - 71.7)        | 75.9 (73.4 - 78.1)        | 3.4                       |             |
| ≥20                      | 24 (1.8)   | 3.0 (1.4 - 5.4)    | 98.6 (97.7 - 99.2)        | 2.17 (0.97 - 4.83)        | 0.98 (0.96 - 1.00)        | 41.7 (22.1 - 63.4)        | 75.5 (73.1 - 77.8)        | 1.6                       |             |
| ≥21                      | 15 (1.1)   | 1.5 (0.5 - 3.5)    | 99.0 (98.2 - 99.5)        | 1.52 (0.52 - 4.41)        | 0.99 (0.98 - 1.01)        | 33.3 (11.8 - 61.6)        | 75.3 (72.9 - 77.6)        | 0.5                       |             |
| ≥22                      | 7 (0.5)    | 0.6 (0.1 - 2.1)    | 99.5 (98.9 - 99.8)        | 1.21 (0.24 - 6.22)        | 1.00 (0.99 - 1.01)        | 28.6 (3.7 - 71.0)         | 75.2 (72.8 - 77.5)        | 0.1                       |             |
| ≥23                      | 4 (0.3)    | 0.3 (0.0 - 1.7)    | 99.7 (99.1 - 99.9)        | 1.01 (0.11 - 9.69)        | 1.00 (0.99 - 1.01)        | 25.0 (0.6 - 80.6)         | 75.2 (72.8 - 77.5)        | 0.0                       |             |
| ≥24                      | 2 (0.2)    | 0.0 (0.0 - 1.1)    | 99.8 (99.3 - 100.0)       | 0.00 (0.00 - 0.00)        | 1.00 (1.00 - 1.00)        | 0.0 (0.0 - 84.2)          | 75.2 (72.8 - 77.5)        | -0.2                      |             |
| PHQ-9 algorithm          | 183 (13.6) | 34.7 (29.6 - 40.1) | 93.4 (91.7 - 94.8)        | 5.25 (3.99 - 6.91)        | 0.70 (0.65 - 0.76)        | 63.4 (56.0 - 70.4)        | 81.3 (78.9 - 83.5)        | 28.1                      |             |
| PHQ-9 adjusted algorithm | 601 (44.6) | 78.1 (73.3 - 82.5) | 66.4 (63.4 - 69.3)        | 2.33 (2.10 - 2.58)        | 0.33 (0.27 - 0.41)        | 43.4 (39.4 - 47.5)        | 90.2 (87.9 - 92.3)        | 44.5                      |             |
| PHQ-2                    | ≥1         | 1052 (78.1)        | 95.2 (92.3 - 97.2)        | 27.5 (24.8 - 30.4)        | 1.31 (1.26 - 1.37)        | 0.17 (0.11 - 0.28)        | 30.2 (27.5 - 33.1)        | 94.6 (91.3 - 96.9)        | 22.7        |
|                          | ≥2         | <b>730 (54.2)</b>  | <b>84.7 (80.4 - 88.4)</b> | <b>55.9 (52.8 - 59.0)</b> | <b>1.92 (1.77 - 2.09)</b> | <b>0.27 (0.21 - 0.35)</b> | <b>38.8 (35.2 - 42.4)</b> | <b>91.7 (89.3 - 93.8)</b> | <b>40.6</b> |
|                          | ≥3         | 358 (26.6)         | 55.4 (49.9 - 60.8)        | 82.9 (80.5 - 85.2)        | 3.24 (2.75 - 3.83)        | 0.54 (0.48 - 0.61)        | 51.7 (46.4 - 57.0)        | 84.9 (82.6 - 87.1)        | 38.3        |
|                          | ≥4         | 225 (16.7)         | 39.5 (34.2 - 45.0)        | 90.8 (88.9 - 92.5)        | 4.30 (3.40 - 5.44)        | 0.67 (0.61 - 0.73)        | 58.7 (51.9 - 65.2)        | 82.0 (79.6 - 84.2)        | 30.3        |
|                          | ≥5         | 99 (7.4)           | 19.2 (15.1 - 23.8)        | 96.5 (95.2 - 97.6)        | 5.55 (3.74 - 8.22)        | 0.84 (0.79 - 0.88)        | 64.6 (54.4 - 74.0)        | 78.4 (76.0 - 80.6)        | 15.7        |
|                          | ≥6         | 63 (4.7)           | 12.0 (8.7 - 15.9)         | 97.7 (96.6 - 98.6)        | 5.27 (3.21 - 8.68)        | 0.90 (0.87 - 0.94)        | 63.5 (50.4 - 75.3)        | 77.1 (74.7 - 79.4)        | 9.7         |

Note: +LR = Positive likelihood ratio. -LR = Negative likelihood ratio. PPV= positive predictive value. NPV= negative predictive value. Youden's Index = Sensitivity+Specificity-1. 95%CI = 95% confidence interval. PHQ = Patient Health Questionnaire. Bold values represent the cohort point with the highest Youden Index.
