# Supplementary material for: Sensitivity and specificity of the Patient Health Questionnaire (PHQ-9, PHQ-8, PHQ-2) and General Anxiety Disorder scale (GAD-7, GAD-2) for depression and anxiety diagnosis: a cross-sectional study in a Peruvian hospital population
Source: PubMed Central journal article supplement — BMJ Open. 2023 Sep 15;13(9):e076193. doi: 10.1136/bmjopen-2023-076193 (PMC10510859; doi:10.1136/bmjopen-2023-076193), 2023-09-15
Supplement: bmjopen-2023-076193supp006.pdf [file bmjopen-2023-076193supp006.pdf]

**Supplementary material 6.** Sensitivity, specificity, PPV, NPV, and Youden's index for different PHQ and GAD cut-off points compared to the gold standard.

| Method                   | Cut-off Points | n (%)             | Sensitivity (95%CI)       | Specificity (95%CI)       | PPV (95%CI)               | NPV (95%CI)               | Youden Index |
|--------------------------|----------------|-------------------|---------------------------|---------------------------|---------------------------|---------------------------|--------------|
| PHQ-9                    | ≥7             | <b>537 (39.9)</b> | <b>76.0 (71.1 - 80.5)</b> | <b>72.1 (69.2 - 74.8)</b> | <b>47.3 (43.0 - 51.6)</b> | <b>90.1 (87.9 - 92.1)</b> | <b>48.1</b>  |
| PHQ-9                    | ≥8             | 454 (33.7)        | 68.9 (63.6 - 73.8)        | 77.9 (75.2 - 80.4)        | 50.7 (46.0 - 55.4)        | 88.4 (86.1 - 90.4)        | 46.8         |
| PHQ-9                    | ≥9             | 371 (27.5)        | 60.2 (54.7 - 65.5)        | 83.2 (80.8 - 85.5)        | 54.2 (49.0 - 59.3)        | 86.4 (84.1 - 88.5)        | 43.4         |
| PHQ-9                    | ≥10            | 309 (22.9)        | 54.2 (48.7 - 59.6)        | 87.4 (85.2 - 89.3)        | 58.6 (53.9 - 63.1)        | 85.3 (83.7 - 86.7)        | 41.6         |
| PHQ-9 algorithm          | -              | 183 (13.6)        | 34.7 (29.6 - 40.1)        | 93.4 (91.7 - 94.8)        | 63.4 (56.0 - 70.4)        | 81.3 (78.9 - 83.5)        | 28.1         |
| PHQ-9 adjusted algorithm | -              | 601 (44.6)        | 78.1 (73.3 - 82.5)        | 66.4 (63.4 - 69.3)        | 43.4 (39.4 - 47.5)        | 90.2 (87.9 - 92.3)        | 44.5         |
| PHQ-8                    | ≥7             | <b>521 (38.7)</b> | <b>74.3 (69.2 - 78.9)</b> | <b>73.1 (70.2 - 75.8)</b> | <b>47.6 (43.2 - 52.0)</b> | <b>89.6 (87.3 - 91.6)</b> | <b>47.4</b>  |
| PHQ-8                    | ≥8             | 428 (31.8)        | 65.6 (60.2 - 70.7)        | 79.4 (76.7 - 81.8)        | 51.2 (46.3 - 56.0)        | 87.5 (85.2 - 89.6)        | 44.9         |
| PHQ-8                    | ≥9             | 357 (26.5)        | 58.4 (52.9 - 63.7)        | 84.0 (81.6 - 86.2)        | 54.6 (49.3 - 59.9)        | 86.0 (83.6 - 88.1)        | 42.4         |
| PHQ-8                    | ≥10            | 286 (21.2)        | 50.0 (44.5 - 55.5)        | 88.3 (86.1 - 90.2)        | 58.4 (52.4 - 64.2)        | 84.3 (81.9 - 86.4)        | 38.3         |
| PHQ-2                    | ≥2             | <b>730 (54.2)</b> | <b>84.7 (80.4 - 88.4)</b> | <b>55.9 (52.8 - 59.0)</b> | <b>38.8 (35.2 - 42.4)</b> | <b>91.7 (89.3 - 93.8)</b> | <b>40.6</b>  |
| PHQ-2                    | ≥3             | 358 (26.6)        | 55.4 (49.9 - 60.8)        | 82.9 (80.5 - 85.2)        | 51.7 (46.4 - 57.0)        | 84.9 (82.6 - 87.1)        | 38.3         |
| GAD-7                    | ≥7             | 360 (26.7)        | 53.6 (33.9 - 72.5)        | 73.8 (71.4 - 76.2)        | 4.2 (2.4 - 6.8)           | 98.7 (97.8 - 99.3)        | 27.4         |
| GAD-7                    | ≥8             | <b>295 (21.9)</b> | <b>53.6 (33.9 - 72.5)</b> | <b>78.8 (76.5 - 81.0)</b> | <b>5.1 (2.9 - 8.3)</b>    | <b>98.8 (97.9 - 99.3)</b> | <b>32.4</b>  |
| GAD-7                    | ≥9             | 230 (17.1)        | 42.9 (24.5 - 62.8)        | 83.5 (81.4 - 85.4)        | 5.2 (2.7 - 8.9)           | 98.6 (97.7 - 99.2)        | 26.4         |
| GAD-7                    | ≥10            | 164 (12.2)        | 39.3 (21.5 - 59.4)        | 88.4 (86.5 - 90.1)        | 6.7 (3.4 - 11.7)          | 98.6 (97.7 - 99.2)        | 27.7         |
| GAD-2                    | ≥2             | <b>681 (50.6)</b> | <b>82.1 (63.1 - 93.9)</b> | <b>50.1 (47.4 - 52.8)</b> | <b>3.4 (2.2 - 5.0)</b>    | <b>99.2 (98.3 - 99.8)</b> | <b>32.2</b>  |
| GAD-2                    | ≥3             | 283 (21.0)        | 42.9 (24.5 - 62.8)        | 79.5 (77.2 - 81.6)        | 4.2 (2.2 - 7.3)           | 98.5 (97.6 - 99.1)        | 22.4         |

Note: PPV= positive predictive value. NPV= negative predictive value. Youden's Index = Sensitivity+Specificity-1. 95%CI = 95% confidence interval. GAD =Generalized Anxiety Disorder Scale. PHQ = Patient Health Questionnaire. Bold values represent the cohort point with the highest Youden Index. All cut-off points for the PHQ and GAD versions can be found in supplementary materials 3 and 4, respectively.
