# Supplementary material for: Sensitivity and specificity of the Patient Health Questionnaire (PHQ-9, PHQ-8, PHQ-2) and General Anxiety Disorder scale (GAD-7, GAD-2) for depression and anxiety diagnosis: a cross-sectional study in a Peruvian hospital population
Source: PubMed Central journal article supplement — BMJ Open. 2023 Sep 15;13(9):e076193. doi: 10.1136/bmjopen-2023-076193 (PMC10510859; doi:10.1136/bmjopen-2023-076193), 2023-09-15
Supplement: bmjopen-2023-076193supp007.pdf [file bmjopen-2023-076193supp007.pdf]

**Supplementary material 7.** Sensitivity, specificity, +LR, –LR, PPV, NPV, and Youden's index for different GAD cut-off points compared to the gold standard.

| Method | Cut-off Points | n (%)             | Sensitivity (95%CI)       | Specificity (95%CI)       | +LR (95%CI)               | -LR (95%CI)               | PPV (95%CI)            | NPV (95%CI)               | Youden Index |
|--------|----------------|-------------------|---------------------------|---------------------------|---------------------------|---------------------------|------------------------|---------------------------|--------------|
| GAD-7  | ≥1             | 1244 (92.4)       | 96.4 (81.7 - 99.9)        | 7.7 (6.4 - 9.3)           | 1.05 (0.97 - 1.12)        | 0.46 (0.07 - 3.19)        | 2.2 (1.4 - 3.1)        | 99.0 (94.7 - 100.0)       | 4.1          |
|        | ≥2             | 1128 (83.7)       | 96.4 (81.7 - 99.9)        | 16.5 (14.6 - 18.6)        | 1.16 (1.07 - 1.25)        | 0.22 (0.03 - 1.49)        | 2.4 (1.6 - 3.5)        | 99.5 (97.5 - 100.0)       | 12.9         |
|        | ≥3             | 960 (71.3)        | 96.4 (81.7 - 99.9)        | 29.3 (26.8 - 31.8)        | 1.36 (1.26 - 1.48)        | 0.12 (0.02 - 0.84)        | 2.8 (1.9 - 4.1)        | 99.7 (98.6 - 100.0)       | 25.7         |
|        | ≥4             | 797 (59.2)        | 89.3 (71.8 - 97.7)        | 41.5 (38.8 - 44.2)        | 1.53 (1.33 - 1.75)        | 0.26 (0.09 - 0.75)        | 3.1 (2.0 - 4.6)        | 99.5 (98.4 - 99.9)        | 30.8         |
|        | ≥5             | 640 (47.5)        | 71.4 (51.3 - 86.8)        | 53.0 (50.3 - 55.7)        | 1.52 (1.19 - 1.93)        | 0.54 (0.30 - 0.97)        | 3.1 (1.9 - 4.8)        | 98.9 (97.8 - 99.5)        | 24.4         |
|        | ≥6             | 491 (36.5)        | 60.7 (40.6 - 78.5)        | 64.1 (61.4 - 66.7)        | 1.69 (1.24 - 2.30)        | 0.61 (0.39 - 0.97)        | 3.5 (2.0 - 5.5)        | 98.7 (97.7 - 99.4)        | 24.8         |
|        | ≥7             | 360 (26.7)        | 53.6 (33.9 - 72.5)        | 73.8 (71.4 - 76.2)        | 2.05 (1.43 - 2.93)        | 0.63 (0.42 - 0.94)        | 4.2 (2.4 - 6.8)        | 98.7 (97.8 - 99.3)        | 27.4         |
|        | <b>≥8</b>      | <b>295 (21.9)</b> | <b>53.6 (33.9 - 72.5)</b> | <b>78.8 (76.5 - 81.0)</b> | <b>2.52 (1.76 - 3.62)</b> | <b>0.59 (0.40 - 0.88)</b> | <b>5.1 (2.9 - 8.3)</b> | <b>98.8 (97.9 - 99.3)</b> | <b>32.4</b>  |
|        | ≥9             | 230 (17.1)        | 42.9 (24.5 - 62.8)        | 83.5 (81.4 - 85.4)        | 2.59 (1.66 - 4.04)        | 0.69 (0.50 - 0.94)        | 5.2 (2.7 - 8.9)        | 98.6 (97.7 - 99.2)        | 26.4         |
|        | ≥10            | 164 (12.2)        | 39.3 (21.5 - 59.4)        | 88.4 (86.5 - 90.1)        | 3.39 (2.09 - 5.50)        | 0.69 (0.51 - 0.93)        | 6.7 (3.4 - 11.7)       | 98.6 (97.7 - 99.2)        | 27.7         |
|        | ≥11            | 120 (8.9)         | 39.3 (21.5 - 59.4)        | 91.7 (90.1 - 93.2)        | 4.75 (2.90 - 7.79)        | 0.66 (0.49 - 0.89)        | 9.2 (4.7 - 15.8)       | 98.6 (97.8 - 99.2)        | 31.0         |
|        | ≥12            | 94 (7.0)          | 28.6 (13.2 - 48.7)        | 93.5 (92.0 - 94.8)        | 4.38 (2.36 - 8.15)        | 0.76 (0.60 - 0.97)        | 8.5 (3.8 - 16.1)       | 98.4 (97.5 - 99.0)        | 22.1         |
|        | ≥13            | 67 (5.0)          | 28.6 (13.2 - 48.7)        | 95.5 (94.3 - 96.6)        | 6.39 (3.39 - 12.10)       | 0.75 (0.59 - 0.95)        | 11.9 (5.3 - 22.2)      | 98.4 (97.6 - 99.0)        | 24.1         |
|        | ≥14            | 50 (3.7)          | 21.4 (8.3 - 41.0)         | 96.7 (95.5 - 97.6)        | 6.42 (2.98 - 13.80)       | 0.81 (0.67 - 0.99)        | 12.0 (4.5 - 24.3)      | 98.3 (97.4 - 98.9)        | 18.1         |
|        | ≥15            | 40 (3.0)          | 14.3 (4.0 - 32.7)         | 97.3 (96.2 - 98.1)        | 5.23 (2.00 - 13.70)       | 0.88 (0.76 - 1.03)        | 10.0 (2.8 - 23.7)      | 98.2 (97.3 - 98.8)        | 11.6         |
|        | ≥16            | 31 (2.3)          | 10.7 (2.3 - 28.2)         | 97.9 (96.9 - 98.6)        | 5.05 (1.63 - 15.60)       | 0.91 (0.80 - 1.04)        | 9.7 (2.0 - 25.8)       | 98.1 (97.2 - 98.8)        | 8.6          |
|        | ≥17            | 19 (1.4)          | 3.6 (0.1 - 18.3)          | 98.6 (97.9 - 99.2)        | 2.62 (0.36 - 18.90)       | 0.98 (0.91 - 1.05)        | 5.3 (0.1 - 26.0)       | 98.0 (97.1 - 98.7)        | 2.2          |
|        | ≥18            | 15 (1.1)          | 0.0 (0.0 - 12.3)          | 98.9 (98.1 - 99.4)        | 0.00 (0.00 - 0.00)        | 1.01 (1.01 - 1.02)        | 0.0 (0.0 - 21.8)       | 97.9 (97.0 - 98.6)        | -1.1         |
|        | ≥19            | 12 (0.9)          | 0.0 (0.0 - 12.3)          | 99.1 (98.4 - 99.5)        | 0.00 (0.00 - 0.00)        | 1.01 (1.00 - 1.01)        | 0.0 (0.0 - 26.5)       | 97.9 (97.0 - 98.6)        | -0.9         |
|        | ≥20            | 8 (0.6)           | 0.0 (0.0 - 12.3)          | 99.4 (98.8 - 99.7)        | 0.00 (0.00 - 0.00)        | 1.01 (1.00 - 1.01)        | 0.0 (0.0 - 36.9)       | 97.9 (97.0 - 98.6)        | -0.6         |
|        | ≥21            | 5 (0.4)           | 0.0 (0.0 - 12.3)          | 99.6 (99.1 - 99.9)        | 0.00 (0.00 - 0.00)        | 1.00 (1.00 - 1.01)        | 0.0 (0.0 - 52.2)       | 97.9 (97.0 - 98.6)        | -0.4         |
| GAD-2  | ≥1             | 1028 (76.3)       | 89.3 (71.8 - 97.7)        | 24.0 (21.7 - 26.4)        | 1.17 (1.03 - 1.34)        | 0.45 (0.15 - 1.31)        | 2.4 (1.6 - 3.6)        | 99.1 (97.3 - 99.8)        | 13.3         |
|        | <b>≥2</b>      | <b>681 (50.6)</b> | <b>82.1 (63.1 - 93.9)</b> | <b>50.1 (47.4 - 52.8)</b> | <b>1.65 (1.37 - 1.97)</b> | <b>0.36 (0.16 - 0.79)</b> | <b>3.4 (2.2 - 5.0)</b> | <b>99.2 (98.3 - 99.8)</b> | <b>32.2</b>  |
|        | ≥3             | 283 (21.0)        | 42.9 (24.5 - 62.8)        | 79.5 (77.2 - 81.6)        | 2.09 (1.34 - 3.24)        | 0.72 (0.52 - 0.99)        | 4.2 (2.2 - 7.3)        | 98.5 (97.6 - 99.1)        | 22.4         |
|        | ≥4             | 141 (10.5)        | 25.0 (10.7 - 44.9)        | 89.8 (88.1 - 91.4)        | 2.46 (1.27 - 4.77)        | 0.84 (0.67 - 1.03)        | 5.0 (2.0 - 10.0)       | 98.3 (97.4 - 98.9)        | 14.8         |
|        | ≥5             | 51 (3.8)          | 14.3 (4.0 - 32.7)         | 96.4 (95.3 - 97.4)        | 4.01 (1.55 - 10.40)       | 0.89 (0.76 - 1.03)        | 7.8 (2.2 - 18.9)       | 98.1 (97.3 - 98.8)        | 10.7         |
|        | ≥6             | 28 (2.1)          | 7.1 (0.9 - 23.5)          | 98.0 (97.1 - 98.7)        | 3.62 (0.90 - 14.50)       | 0.95 (0.86 - 1.05)        | 7.1 (0.9 - 23.5)       | 98.0 (97.1 - 98.7)        | 5.1          |

Note: +LR = Positive likelihood ratio. –LR = Negative likelihood ratio. PPV= positive predictive value. NPV= negative predictive value. Youden's Index = Sensitivity+Specificity-1. 95%CI = 95% confidence interval. GAD =Generalized Anxiety Disorder Scale. Bold values represent the cut-off with the highest Youden Index.
